# Supplementary material
Source: Royal Society of Chemistry journal article supplement (doi:10.1039/d5fb00944h)
Supplement: d5fb00944h1.pdf [file d5fb00944h1.pdf]

**Repurposing grape pomace as a functional ingredient: in-depth analytical characterization and *in vitro* bioaccessibility evaluation of the phenolic fraction**

Filippo Peruccaccia, Luciano Mangiapelo, Shahd Ali, Francesca Blasi, Federica Ianni\*, Lina Cossignani

Department of Pharmaceutical Sciences, University of Perugia, 06126 Perugia, Italy.

**Corresponding authors:**

Federica Ianni: [federica.ianni@unipg.it](mailto:federica.ianni@unipg.it)

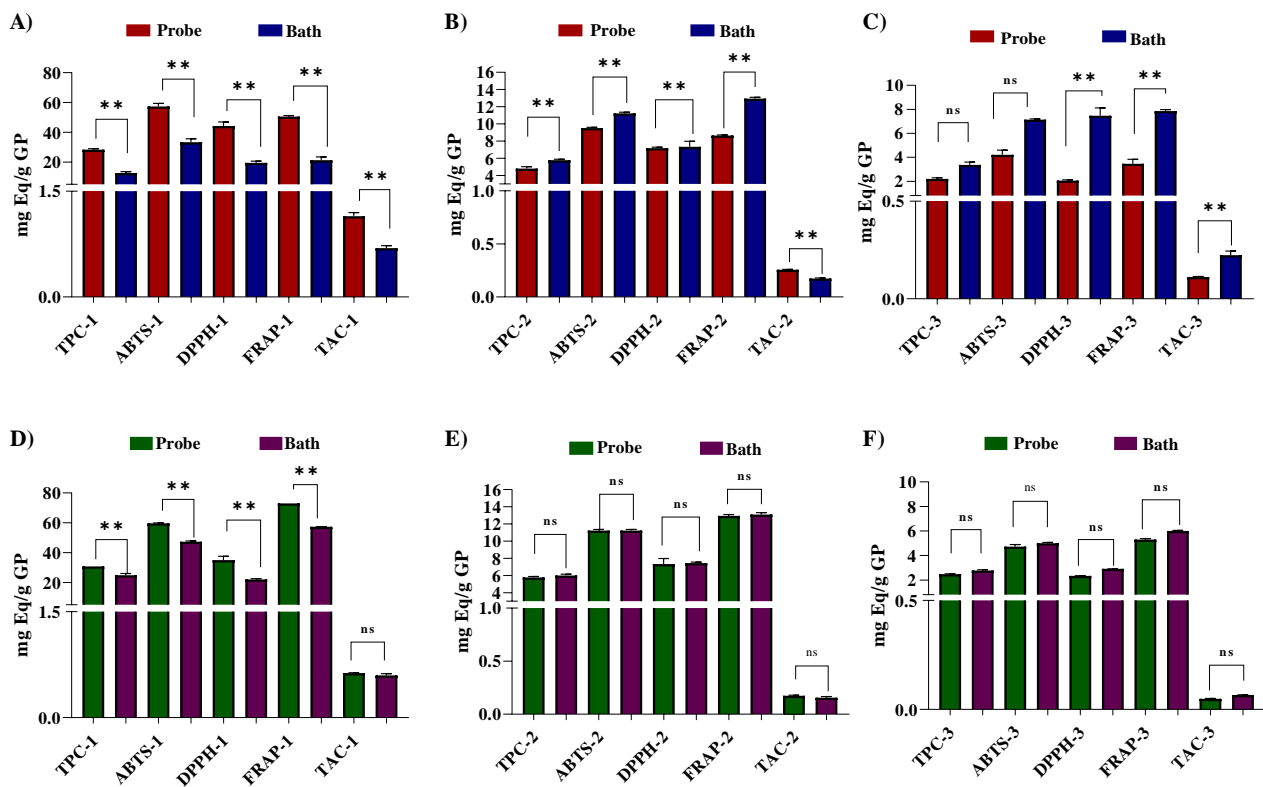

**Figure S1.** Graphic representation of TPC, AOX and TAC after consecutive extractions using probe and bath systems for Cabernet Sauvignon extracts (A-C) and Merlot (D-F) – \*\*  $p$ -value < 0.05, ns= non-significant.
